# Supplementary material
Source: PubMed Central journal article supplement (PMC8011937)
Supplement: NIHMS1676542-supplement-Supp_Info__Inclusion_Exclusion.pdf [file NIHMS1676542-supplement-Supp_Info__Inclusion_Exclusion.pdf]

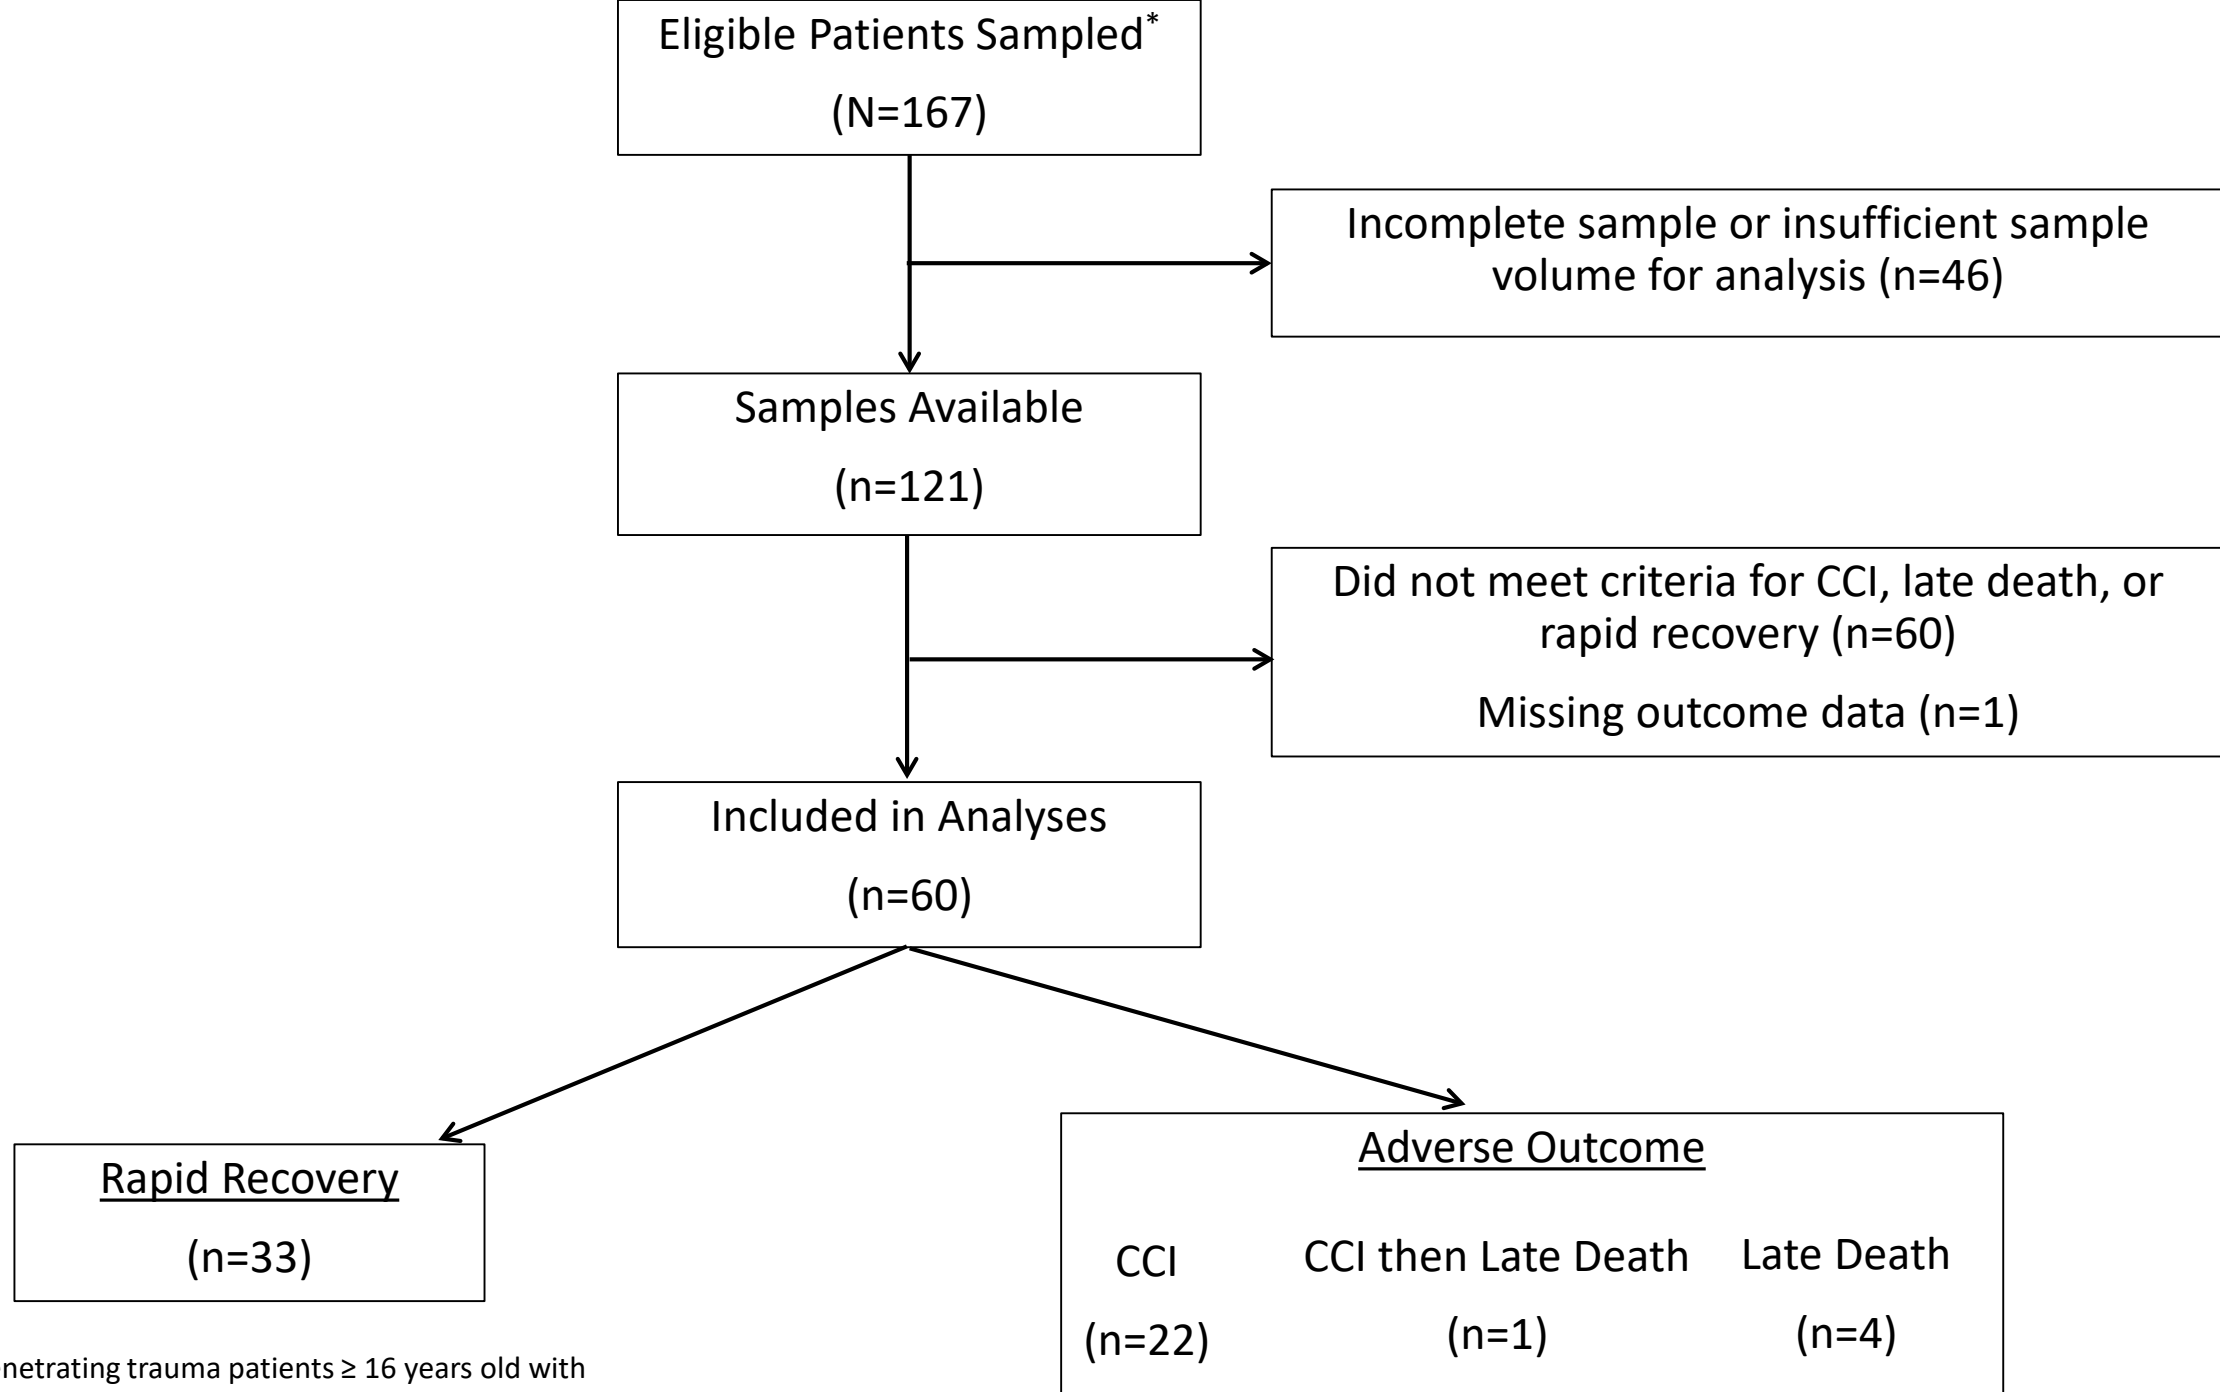

\*Blunt or penetrating trauma patients  $\geq 16$  years old with evidence of shock, and without isolated severe neurologic injury
