# Supplementary material
Source: PubMed Central journal article supplement (PMC8011937)
Supplement: NIHMS1676542-supplement-Supp_Table_1_2_3.pdf [file NIHMS1676542-supplement-Supp_Table_1_2_3.pdf]

**Supplementary Table 1:** List of all metabolites detected on mass spectrometry.

| <b>Metabolites</b>          |                             |                        |                                                                    |                        |                      |
|-----------------------------|-----------------------------|------------------------|--------------------------------------------------------------------|------------------------|----------------------|
| 1-Methyladenosine           | Asparagine                  | Glucuronic acid        | L-2-Aminobutyric acid                                              | Pantothenic acid       | Urate                |
| 1-Methylhistidine           | Aspartic acid               | Glutamic acid          | Lactate                                                            | Phenylacetylglutamine  | Ureidopropionic acid |
| 1-Methylnicotinamide        | Asymmetric dimethylarginine | Glutamine              | Leucate                                                            | Phenylalanine          | Uridine              |
| 2-Amino adipate             | $\beta$ -Alanine            | Glutaryl carnitine     | Leucine                                                            | Phenylglyoxylic acid   | Valine               |
| 2-Hydroxybutyrate           | Betaine                     | Glyceraldehyde         | Linoleic acid                                                      | Phenyllactic acid      | Xanthine             |
| 2-Hydroxyphenylacetate      | Cadaverine                  | Glycerophosphocholine  | Linolenic acid                                                     | Phenylpyruvic acid     | Xanthurenic acid     |
| 3-Aminoisobutyrate          | Caffeine                    | Glycine                | Lysine                                                             | Pipecolic acid         | Xylonic acid         |
| 3-Hydroxyanthranilic acid   | Carnitine                   | Glycochenodeoxycholate | Malate                                                             | Proline                |                      |
| 3-Hydroxybutyric acid       | Cholesteryl sulfate         | Glycocholate           | Malondialdehyde                                                    | Pseudouridine          |                      |
| 3-Hydroxyisovaleric acid    | Choline                     | Glycolic acid          | Mannitol                                                           | Pyroglutamic acid      |                      |
| 3-Hydroxyphenylacetic acid  | Citrulline                  | Guanidinoacetate       | Methionine                                                         | Pyruvate               |                      |
| 3-Indoxyl sulfate           | Cortisol                    | Hippuric acid          | Methionine sulfoxide                                               | Reduced glutathione    |                      |
| 4-Pyridoxic acid            | Cotinine                    | Histidine              | Methylcysteine                                                     | Riboflavin             |                      |
| 5-Aminovaleric acid         | Creatine                    | Homoarginine           | Mevalonate                                                         | S-Adenosylmethionine   |                      |
| 5-Methylthioadenosine       | Creatinine                  | Homocitrulline         | MOPEG sulfate                                                      | S-Adenosylhomocysteine |                      |
| 5-Methyluridine             | Cystathionine               | Hydrocinnamic acid     | Myristic acid                                                      | Serine                 |                      |
| 6-Methyladenosine           | Cysteine-S-sulfate          | Hydroxyproline         | N-Acetyl-L-alanine                                                 | Sorbitol               |                      |
| 7-Methylguanine             | Cysteinylglycine            | Hypotaurine            | N-Acetyl-L-aspartate                                               | Succinate              |                      |
| Acetylcarnitine             | Cystine                     | Hypoxanthine           | N-Acetyl-L-glutamic acid                                           | Succinylcarnitine      |                      |
| Adenine                     | Cytidine                    | Indole-3-acetic acid   | N-Acetyl glycine                                                   | Sucrose                |                      |
| Adenosine                   | Deoxycarnitine              | Indole-3-lactate       | N-Acetylneuraminate                                                | Taurine                |                      |
| Alanine                     | Deoxycholic acid            | Indole-3-propionate    | N-Formyl-L-methionine                                              | Theophylline           |                      |
| Allantoin                   | Dihydrouracil               | Inosine                | N <sub>2</sub> ,N <sub>2</sub> -Dimethylguanosine                  | Thiamine               |                      |
| $\alpha$ -Hydroxyglutarate  | Dimethylglycine             | Inositol               | N <sub>6</sub> -Acetyl-L-lysine                                    | Threonine              |                      |
| $\alpha$ -Ketoglutaric acid | Erythronic acid             | Isoleucine             | N <sub>6</sub> ,N <sub>6</sub> ,N <sub>6</sub> -Trimethyl-L-lysine | Thyroxine              |                      |
| $\alpha$ -Tocopherol        | Ethanolamine                | Isovaleric acid        | Niacinamide                                                        | Trigonelline           |                      |
| AMP                         | Ethylmalonic acid           | Isovaleryl carnitine   | O-Phosphoethanolamine                                              | Trimethylamine N-oxide |                      |
| Arabitol                    | FAD                         | Isovalerylglycine      | Ornithine                                                          | Tryptophan             |                      |
| Arachidonate                | Gluconolactone              | Kynurenic acid         | Oxidized glutathione                                               | Tyrosine               |                      |
| Arginine                    | Glucose                     | Kynurenine             | Palmitic acid                                                      | Uracil                 |                      |

**Supplementary Table 2:** Evaluation of PLS-DA models comparing injury outcome groups using cross-validation and permutation tests.

|                                         | Time Point | Cross Validation |                | Permutation <i>p</i> value |
|-----------------------------------------|------------|------------------|----------------|----------------------------|
|                                         |            | R <sup>2</sup>   | Q <sup>2</sup> |                            |
| <b>CCI/Death vs.<br/>Rapid Recovery</b> | Hour 12    | 0.35             | 0.01           | > 0.05                     |
|                                         | Day 1      | 0.62             | 0.33           | < 0.05                     |
|                                         | Day 4      | 0.64             | 0.43           | < 0.01                     |
|                                         | Day 7      | 0.74             | 0.57           | < 0.001                    |

**Supplementary Table 3:** Metabolites with variable importance in projection (VIP) score > 2 for each PLS-DA comparing injury outcome groups.

|                                         | Hour 12                | Day 1                  | Day 4                  | Day 7                  |
|-----------------------------------------|------------------------|------------------------|------------------------|------------------------|
| <b>CCI/Death vs.<br/>Rapid Recovery</b> | Succinylcarnitine      |                        | Sucrose                | Glucuronic acid        |
|                                         | Phenylacetylglutamine  | Phenylacetylglutamine  | Phenylacetylglutamine  | Phenylglyoxylic acid   |
|                                         | MOPEG Sulfate          | Hippuric acid          | Trimethylamine N-oxide | Phenylacetylglutamine  |
|                                         | Glycochenodeoxycholate | 1-Methylnicotinamide   | 4-Pyridoxic acid       | 2-Hydroxyphenylacetate |
|                                         | Trimethylamine N-oxide | Trimethylamine N-oxide | Hippuric acid          | Isovalerylglycine      |
|                                         | 3-Indoxyl sulfate      | Succinylcarnitine      | MOPEG Sulfate          | Trimethylamine N-oxide |
|                                         | Glucuronic acid        | 3-Indoxyl sulfate      | 3-Hydroxybutyric acid  | Indole-3-propionate    |
|                                         | Xanthine               | Riboflavin             | Indole-3-acetic acid   | Pantothenic acid       |
|                                         | AMP                    | Kynurenic acid         | 3-Indoxyl sulfate      | Cystathionine          |
|                                         | 4-Pyridoxic acid       | Cystathionine          | Glucuronic acid        | MOPEG Sulfate          |
|                                         |                        |                        | 2-Hydroxyphenylacetate |                        |
|                                         |                        |                        | Succinylcarnitine      |                        |
|                                         |                        |                        | Phenyllactic acid      |                        |
