# Supplementary material
Source: PubMed Central journal article supplement (PMC8011937)

Figure 2a.

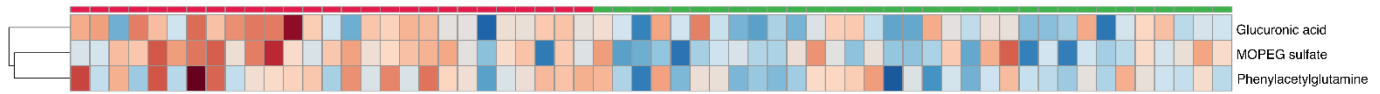

Figure 2b.

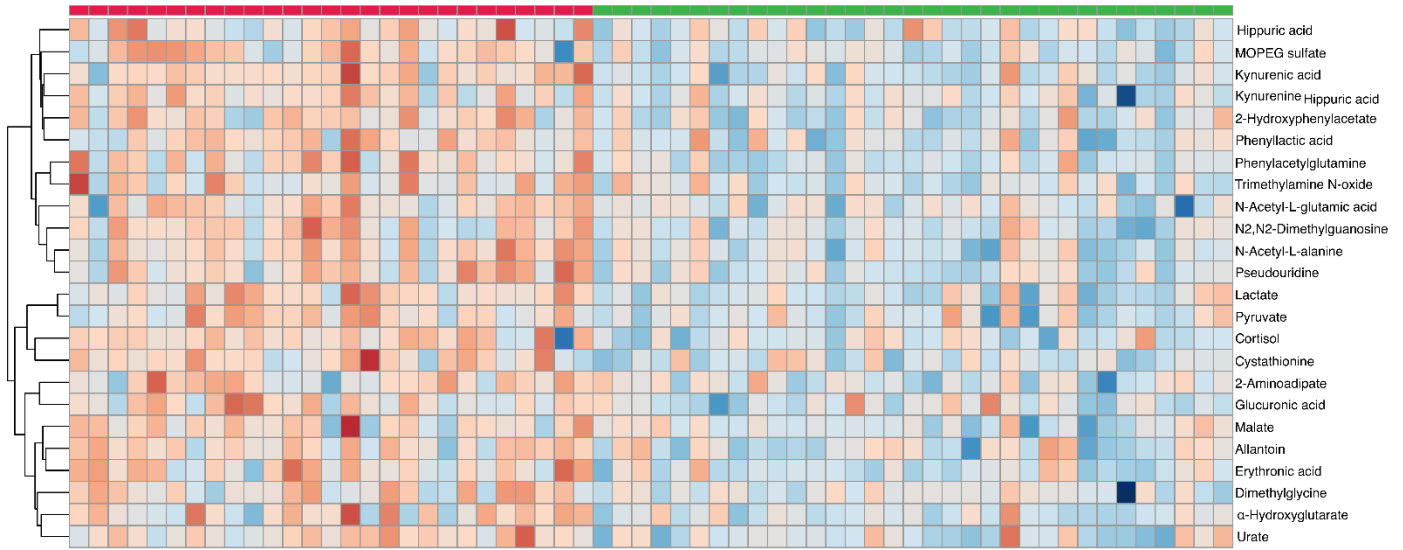

Figure 2c.

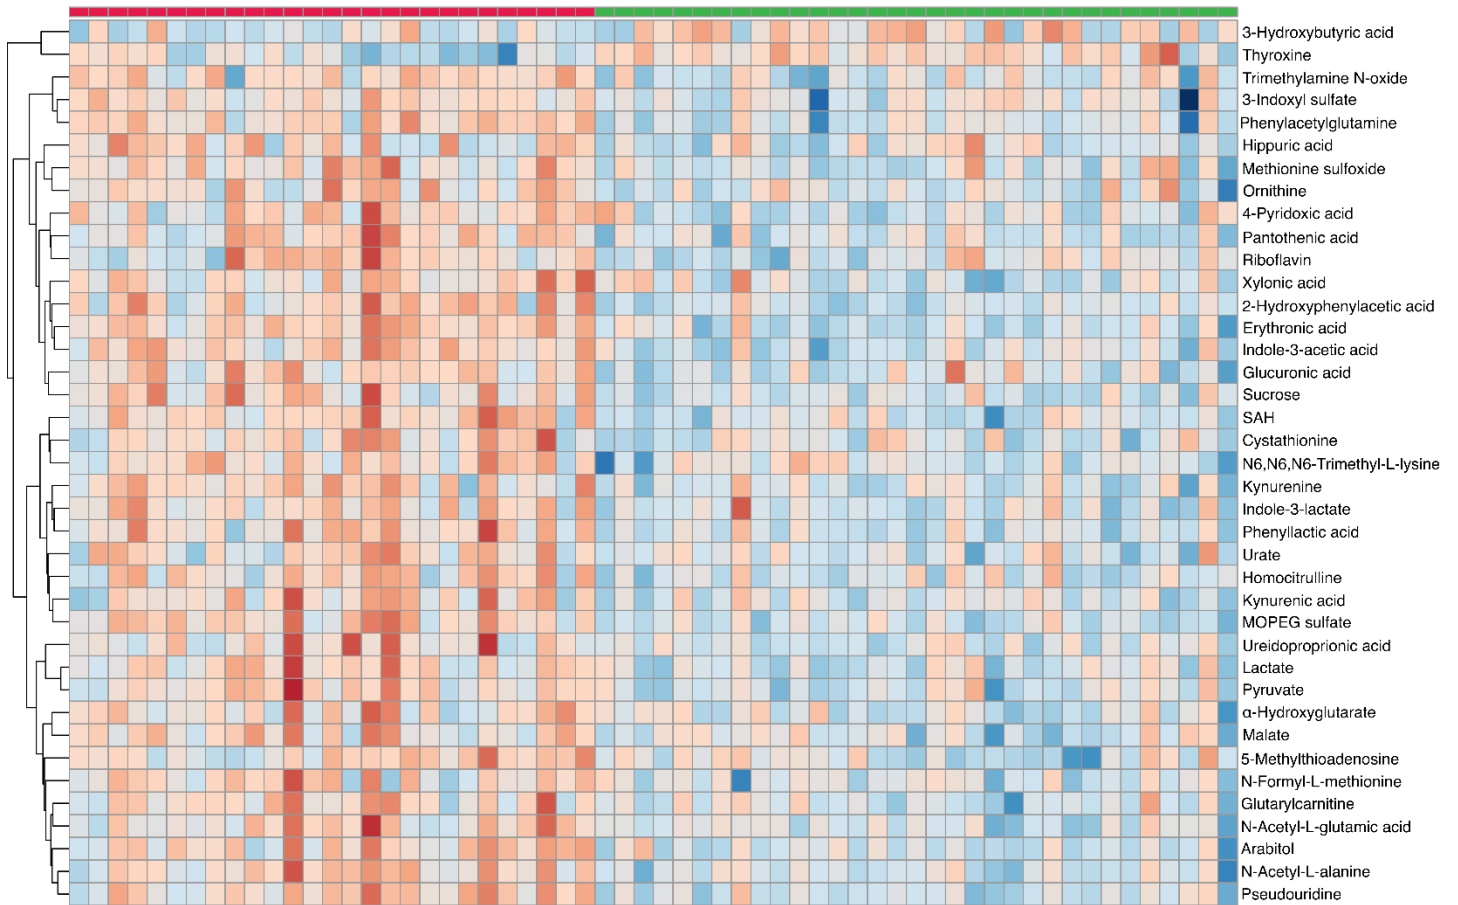

Figure 2d.

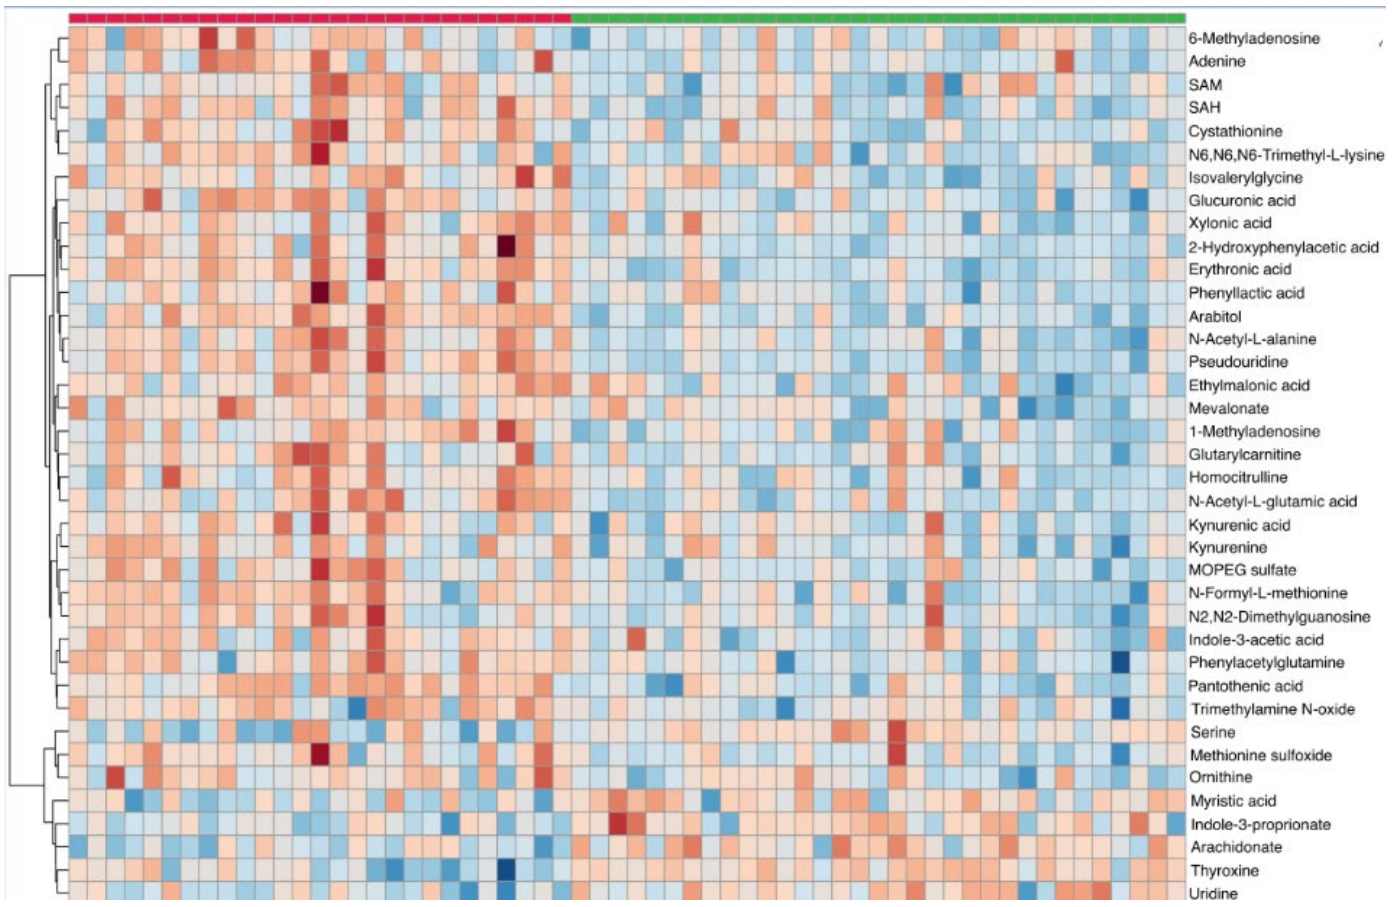

Supplemental Figure Legend

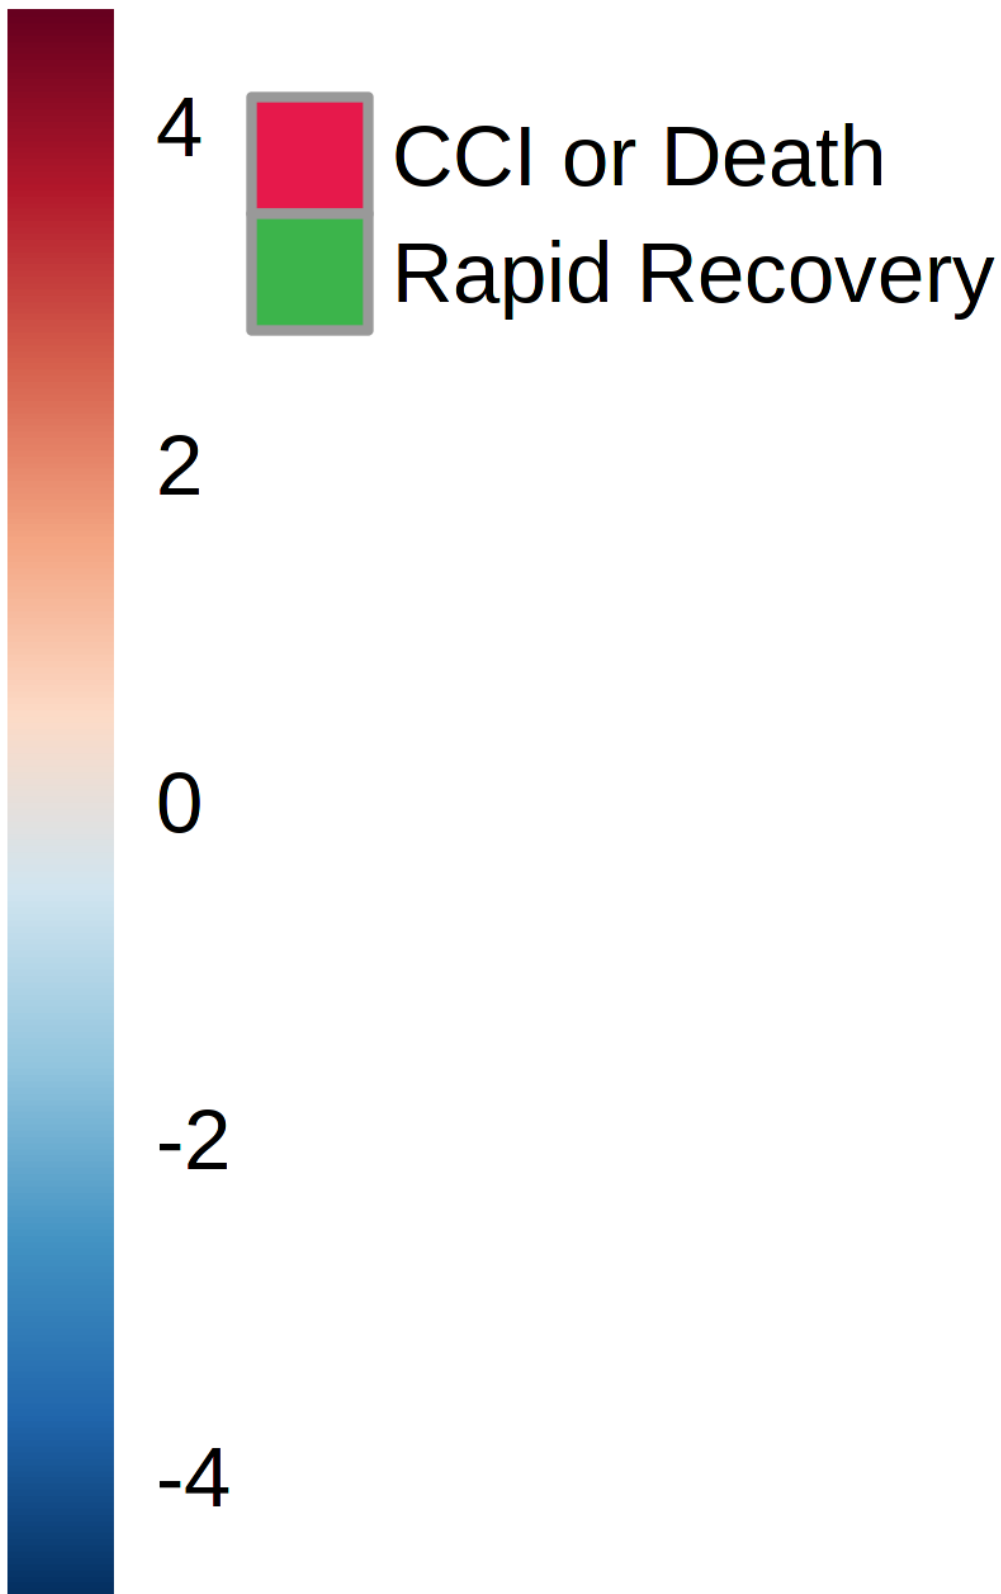

Supplement: NIHMS1676542-supplement-Supp_Figure_2.pdf [file NIHMS1676542-supplement-Supp_Figure_2.pdf]
